# Supplementary material
Source: PubMed Central journal article supplement (PMC6128512)
Supplement: jamacardiol-3-481-s001.pdf [file jamacardiol-3-481-s001.pdf]

## Supplementary Online Content

Viswanathan SK, Puckelwartz MJ, Mehta A, et al. Association of Cardiomyopathy With *MYBPC3* D389V and *MYBPC3*<sup>Δ25bp</sup> Intronic Deletion in South Asian Descendants. *JAMA Cardiol*. Published online April 11, 2018. doi:10.1001/jamacardio.2018.0618

**eFigure 1.** Genotype-Phenotype Features of the *MYBPC3*<sup>Δ25bp</sup> Variant Carriers

**eFigure 2.** Evaluation of Rare Protein-Altering Variation in 46 Cardiomyopathy Genes in 72 US-SAs Who Were Carriers or Noncarriers of the *MYBPC3*<sup>Δ25bp</sup> Variant

**eFigure 3.** *MYBPC3*<sup>D389V</sup> is Conserved and Enriched in *MYBPC3*<sup>Δ25bp</sup> Gene Carriers.

**eFigure 4.** D389V is Carried on the Same Single Allele as *MYBPC3*<sup>Δ25bp</sup> and is Associated With Increased LVFS and Irregular Ca<sup>2+</sup> Transients in iPSC-derived Cardiomyocytes

**eTable 1.** Illumina TruSight Cardio Panel of 174 Cardiovascular Disease Genes

**eTable 2.** Rare Variants in the 46-gene Cardiomyopathy Panel Found in Southeast Asian Cohort, Including *TTN* Variants

**eTable 3.** Rare Variants in the 46-gene Cardiomyopathy Panel Found in Southeast Asian Cohort, Excluding *TTN* Variants

**eTable 4.** Fisher's Exact Test of *MYBPC3*<sup>Δ25bp</sup> Carriers vs Noncarriers

**eTable 5.** Subjects Excluded From Analysis and Rationale

This supplementary material has been provided by the authors to give readers additional information about their work.

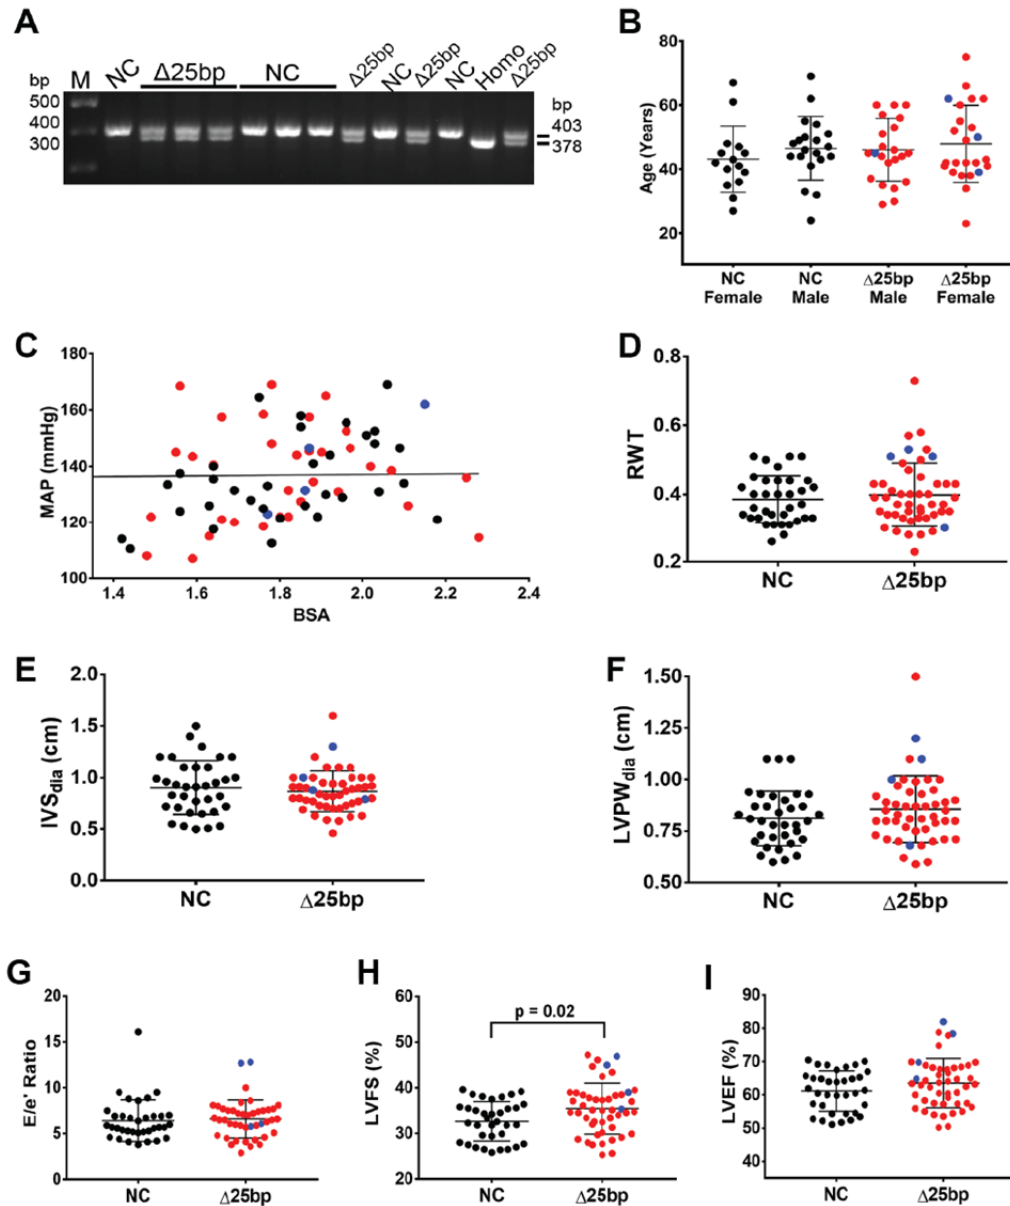

**eFigure 1. Genotype-phenotype features of the *MYBPC3*<sup>Δ25bp</sup> variant carriers.**

(A) PCR-based genotyping was used to detect noncarriers (NC), heterozygous ( $\Delta 25bp$ ), and homozygous (Homo) variant carriers. The symbol  $\Delta$  indicates the 25bp deletion. (B) Age distribution of the subjects who underwent echocardiographic evaluation grouped by genotype and gender (n=82). (C) Comparison of mean arterial pressure (MAP) and body surface area (BSA) showing equal distribution of carriers and noncarriers. Comparison of key cardiomyopathy-related echocardiographic parameters namely (D) relative wall thickness (RWT), (E) ventricular septal thickness during diastole ( $IVS_{dia}$ ), (F) free wall thickness during diastole ( $LVPW_{dia}$ ), (G) ratio of early transmitral flow (E) to left ventricular early diastolic velocity ( $e'$ ) ( $E/e'$  ratio), (H) left ventricular fractional shortening (LVFS %) and (I) left ventricular ejection fraction (LVEF %) among *MYBPC3*<sup>Δ25bp</sup> variant carriers (n=47), including homozygous carriers and noncarriers (n=35). Blue markers represent homozygous carriers, while red markers represent heterozygous carriers. Statistical comparison between the groups performed using unpaired *t*-test.

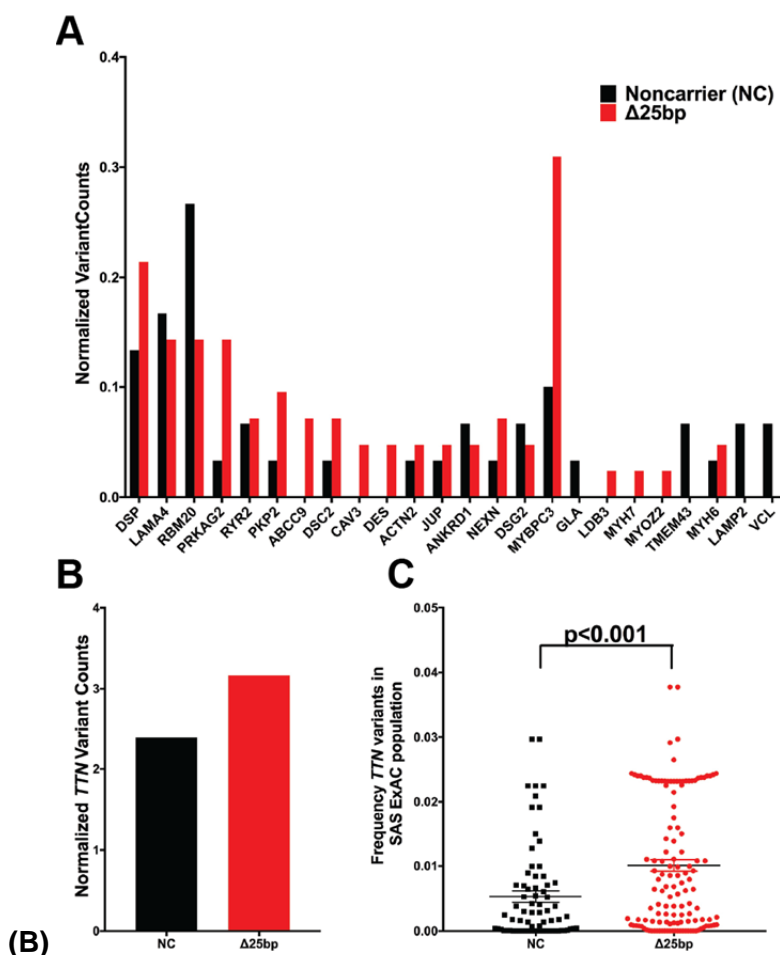

**eFigure 2. Evaluation of rare protein-altering variation in 46 cardiomyopathy genes in 72 US-SAs who were carriers or noncarriers of the *MYBPC3* <sup>$\Delta 25bp$</sup>  variant.**

Additional cardiomyopathy genes (n=46) were fully sequenced. Rare protein-altering variants were evaluated, and an excess of rare protein-altering variation was seen in carriers compared to noncarriers. **(A)** The number of variants was normalized to cohort size, and the groups were compared. The genetic signature differed between *MYBPC3* <sup>$\Delta 25bp$</sup>  carriers (red) and noncarriers (NC, black). **(B)** *MYBPC3* <sup>$\Delta 25bp$</sup>  carriers had an excess of *TTN* variants with 3.2 rare *TTN* variants, while noncarriers had approximately 2.4 rare *TTN* variants per subject. **(C)** Rare *TTN* variants, as identified in *MYBPC3* <sup>$\Delta 25bp$</sup>  carriers, had a higher frequency in US-SAs compared to *TTN* variants identified in noncarriers, indicating a distinct genetic background in *MYBPC3* <sup>$\Delta 25bp$</sup>  carriers compared to noncarriers ( $p < 0.001$ ). Using Southeast Asian (SAS) population frequencies from ExAC<sup>18</sup>, population frequency differed for *TTN* variants in *MYBPC3* <sup>$\Delta 25bp$</sup>  carriers compared to the noncarrier group (mean frequency  $0.010 \pm 0.0009$  in *MYBPC3* <sup>$\Delta 25bp$</sup>  carriers and  $0.005 \pm 0.001$  in noncarriers,  $p < 0.001$ ; *TTN* variants not identified in ExAC were given a population frequency of zero.). This same analysis conducted with European (Non-Finnish) population frequencies showed no difference between *MYBPC3* <sup>$\Delta 25bp$</sup>  carriers and noncarriers ( $0.001 \pm 0.0002$  and  $0.001 \pm 0.0003$ , carrier and noncarrier variants, respectively;  $p = 0.9141$ ). This finding was also specific to the *TTN* locus since analysis of non-*TTN* cardiomyopathy genes using SAS population data did not substantially differ between the *MYBPC3* <sup>$\Delta 25bp$</sup>  carrier and noncarrier groups ( $0.006 \pm 0.001$  and  $0.004 \pm 0.001$ , carrier and noncarrier variants, respectively;  $p = 0.48$ ).

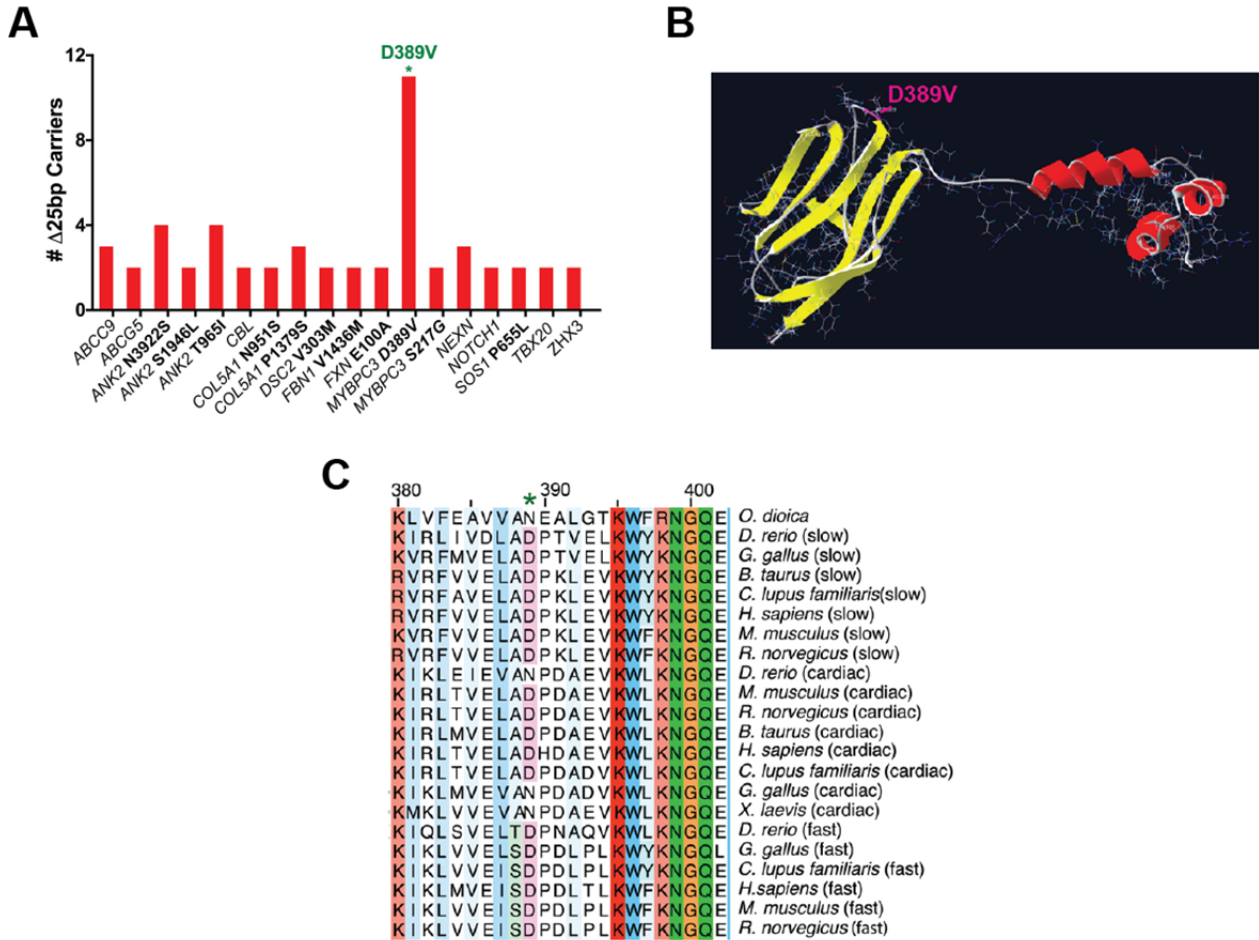

**eFigure 3. *MYBPC3*<sup>D389V</sup> is conserved and enriched in *MYBPC3*<sup>Δ25bp</sup> gene carriers. (A)** Among *MYBPC3*<sup>Δ25bp</sup> carriers, D389V was overrepresented, compared to other rare variants, and was uniquely found in *MYBPC3*<sup>Δ25bp</sup> carriers (Fisher’s test, p=0.0017). **(B)** Ribbon diagram of C2 domain of cMyBP-C indicating the location of Asp 389, which is highly conserved part of a polymorphic protein-binding region. **(C)** ClustalW alignment of cMyBP-C amino acids showing the evolutionary conservation of Asp 389 (green asterisks) across species.

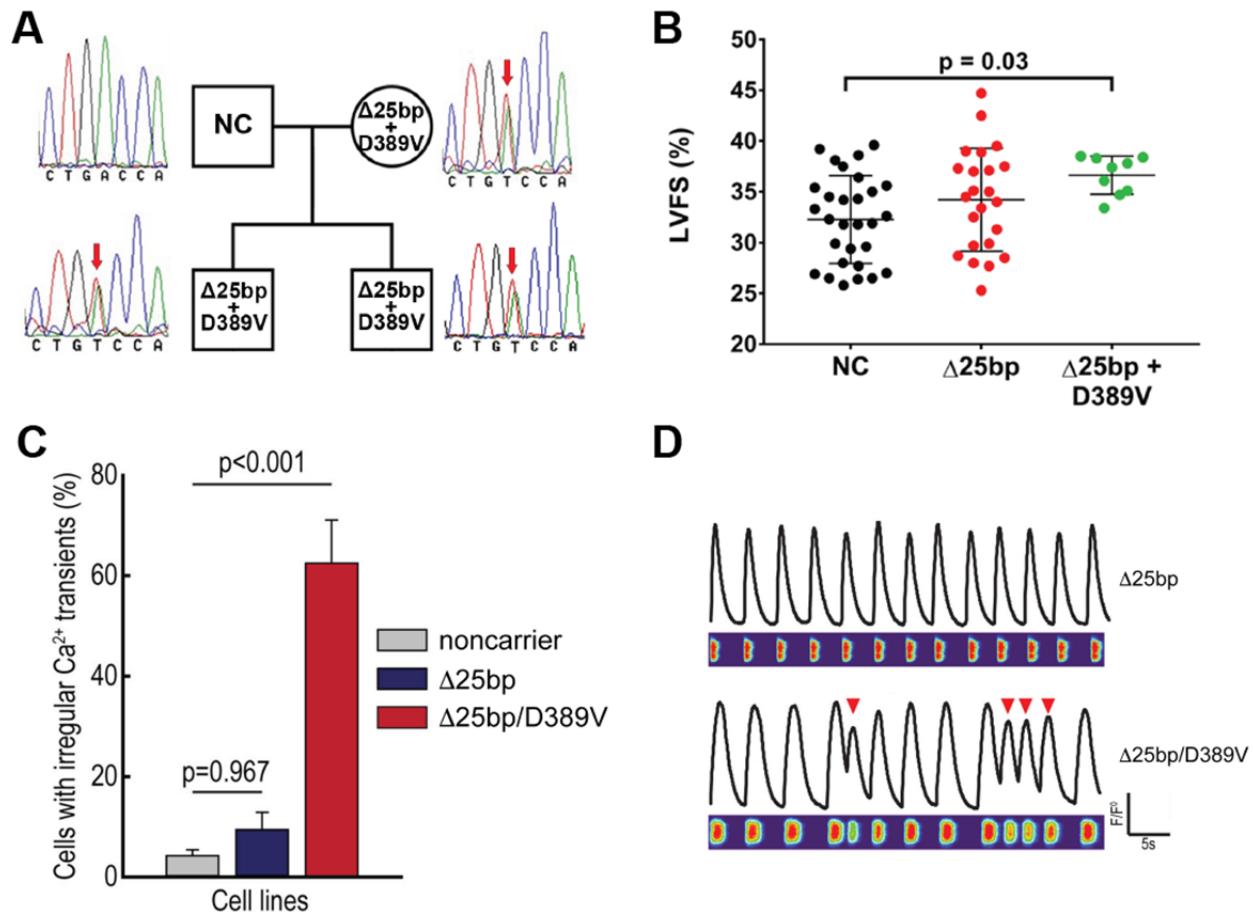

**eFigure 4. D389V is carried on the same single allele as  $\text{MYBPC3}^{\Delta 25\text{bp}}$  and is associated with increased LVFS and irregular  $\text{Ca}^{2+}$  transients in iPSC-derived cardiomyocytes.** (A) Family segregation demonstrates that  $\text{MYBPC3}^{\Delta 25\text{bp}}$  and D389V (red arrow) are located on the same allele. The parent with both  $\text{MYBPC3}^{\Delta 25\text{bp}}$  and D389V has classic LV diastolic dysfunction without LVH while the oldest son has LVH with LA enlargement. PCR-based genotyping was used to detect noncarriers (NC), heterozygous ( $\Delta 25\text{bp}$ ), and homozygous (Homo) variant carriers. The symbol  $\Delta$  indicates the 25bp deletion. (B) LVFS was significantly elevated (mean  $\pm$  sem) in subjects that carry  $\text{MYBPC3}^{\Delta 25\text{bp}/\text{D389V}}$  compared to noncarriers and those with  $\text{MYBPC3}^{\Delta 25\text{bp}}$  alone. (C) Frequency of cells with  $\text{Ca}^{2+}$  transient irregularities represented as a percentage. Cells carrying  $\text{MYBPC3}^{\Delta 25\text{bp}/\text{D389V}}$  (red bar) showed significantly increased frequency ( $p > 0.001$ ) compared to both  $\text{MYBPC3}^{\Delta 25\text{bp}}$  alone (blue bar) and noncarrier (grey bar) controls. (D) Representative line scan image showing normal spontaneous  $\text{Ca}^{2+}$  transients in  $\text{MYBPC3}^{\Delta 25\text{bp}}$  cardiomyocytes (top) or arrhythmic  $\text{Ca}^{2+}$  transients in  $\text{MYBPC3}^{\Delta 25\text{bp}/\text{D389V}}$  cardiomyocytes (bottom). Red arrowheads indicate arrhythmic  $\text{Ca}^{2+}$  transients. One-way ANOVA and Tukey's post hoc test were used.

**eTable 1.** Illumina TruSight Cardio panel of 174 cardiovascular disease genes

|               |              |             |            |               |              |               |               |              |
|---------------|--------------|-------------|------------|---------------|--------------|---------------|---------------|--------------|
| <b>ABCC9</b>  | CACNB2       | DOLK        | GJA5       | KCNJ5         | MYH11        | PRDM16        | SGCG          | <b>TNNC1</b> |
| ABCG5         | CALM1        | DPP6        | <b>GLA</b> | KCNJ8         | <b>MYH6</b>  | <b>PRKAG2</b> | SHOC2         | <b>TNNI3</b> |
| ABCG8         | CALR3        | <b>DSC2</b> | GPD1L      | KCNQ1         | <b>MYH7</b>  | PRKAR1A       | SLC25A4       | <b>TNNT2</b> |
| ACTA1         | <b>CASQ2</b> | <b>DSG2</b> | GPIHBP1    | KLF10         | <b>MYL2</b>  | PTPN11        | SLC2A10       | <b>TPM1</b>  |
| ACTA2         | <b>CAV3</b>  | <b>DSP</b>  | HADHA      | KRAS          | <b>MYL3</b>  | RAF1          | SMAD3         | TRDN         |
| <b>ACTC1</b>  | CBL          | <b>DTNA</b> | HCN4       | LAMA2         | MYLK         | RANGRF        | SMAD4         | TRIM63       |
| <b>ACTN2</b>  | CBS          | EFEMP2      | HFE        | <b>LAMA4</b>  | <b>MYLK2</b> | <b>RBM20</b>  | SNTA1         | TRPM4        |
| AKAP9         | CETP         | ELN         | HRAS       | <b>LAMP2</b>  | MYO6         | RYR1          | SOS1          | <b>TTN</b>   |
| ALMS1         | COL3A1       | <b>EMD</b>  | HSPB8      | <b>LDB3</b>   | <b>MYOZ2</b> | <b>RYR2</b>   | SREBF2        | <b>TTR</b>   |
| ANK2          | COL5A1       | EYA4        | ILK        | LDLR          | MYPN         | SALL4         | <b>TAZ</b>    | TXNRD2       |
| <b>ANKRD1</b> | COL5A2       | FBN1        | JAG1       | LDLRAP1       | <b>NEXN</b>  | SCN1B         | TBX20         | <b>VCL</b>   |
| APOA4         | COX15        | FBN2        | JPH2       | LMF1          | NKX2-5       | SCN2B         | TBX3          | ZBTB17       |
| APOA5         | CREB3L3      | FHL1        | <b>JUP</b> | <b>LMNA</b>   | NODAL        | SCN3B         | TBX5          | ZHX3         |
| APOB          | CRELD1       | <b>FHL2</b> | KCNA5      | LPL           | NOTCH1       | SCN4B         | <b>TCAP</b>   | ZIC3         |
| APOC2         | <b>CRYAB</b> | FKRP        | KCND3      | LTBP2         | NPPA         | SCN5A         | TGFB2         |              |
| APOE          | <b>CSRP3</b> | FKTN        | KCNE1      | MAP2K1        | NRAS         | SCO2          | TGFB3         |              |
| BAG3          | <b>CTF1</b>  | FXN         | KCNE2      | MAP2K2        | PCSK9        | SDHA          | TGFBR1        |              |
| BRAF          | <b>DES</b>   | GAA         | KCNE3      | MIB1          | PDLIM3       | SEPN1         | TGFBR2        |              |
| CACNA1C       | DMD          | GATAD1      | KCNH2      | MURC          | <b>PKP2</b>  | SGCB          | <b>TMEM43</b> |              |
| CACNA2D1      | DNAJC19      | GCKR        | KCNJ2      | <b>MYBPC3</b> | <b>PLN</b>   | <b>SGCD</b>   | TMPO          |              |

This panel sequences all exons of 174 inherited cardiac disease genes. Analysis of results was performed on the entire set and the subset of 46 cardiomyopathy genes, which are in bold.

**eTable 2.** Rare variants in the 46-gene cardiomyopathy panel found in Southeast Asian cohort, including *TTN* variants

---

|          | <b># of variants including<br/><i>TTN</i> variants</b> | <b># identified in <i>MYBPC3</i><sup>Δ25bp</sup><br/>carriers (n=42)</b> | <b># identified in<br/>noncarriers (n=30)</b> |
|----------|--------------------------------------------------------|--------------------------------------------------------------------------|-----------------------------------------------|
| MODERATE | 298                                                    | 197                                                                      | 101                                           |
| HIGH     | 9                                                      | 7                                                                        | 2                                             |

---

All variants with ExAC  $\leq 0.01$  MODERATE-effect variants are missense variants and inframe indels, while HIGH-effect variants are protein-disrupting variants, such as frameshifting variants, stop-gain, stop-loss, and splice-site variants.

**eTable 3.** Rare variants in the 46-gene cardiomyopathy panel found in Southeast Asian cohort, excluding *TTN* variants

---

|          | <b># of variants excluding<br/><i>TTN</i> variants</b> | <b># identified in <i>MYBPC3</i><sup>Δ25bp</sup><br/>carriers (n=42)</b> | <b># identified in<br/>noncarriers (n=30)</b> |
|----------|--------------------------------------------------------|--------------------------------------------------------------------------|-----------------------------------------------|
| MODERATE | 103                                                    | 66                                                                       | 37                                            |
| HIGH     | 7                                                      | 6                                                                        | 1                                             |

---

All variants with ExAC  $\leq 0.01$ , excluding *TTN* variants.

**eTable 4.** Fisher's Exact test of *MYBPC3*<sup>Δ25bp</sup> carriers versus noncarriers

| <b>Gene</b> | <b>Variants</b> | <b>p value</b> |
|-------------|-----------------|----------------|
| MYBPC3      | D389V           | 0.0019         |
| ABCC9       | c.2238G>A       | ns             |
| ABCG5       | V300I           | ns             |
| ANK2        | N3922S          | ns             |
| ANK2        | S1946L          | ns             |
| ANK2        | T965I           | ns             |
| CBL         | His36_37insHis  | ns             |
| CDC27       | I240L           | ns             |
| COL5A1      | N951S           | ns             |
| COL5A1      | P1379S          | ns             |
| DSC2        | V303M           | ns             |
| FBN1        | V1436M          | ns             |
| FXN         | E100A           | ns             |
| MYBPC3      | S217G           | ns             |
| NEXN        | E318A           | ns             |
| NOTCH1      | N104S           | ns             |
| SOS1        | P655L           | ns             |
| TBX20       | L244F           | ns             |
| ZHX3        | P258L           | ns             |

Fisher's Exact test comparing the variations identified in *MYBPC3*<sup>Δ25bp</sup> variant carriers and noncarriers



**eTable 5.** Subjects excluded from analysis and rationale

| <b>Subject</b>                                 | <b>Reason for omitting</b>                                                                    | <b>Possible Genetic Variant</b>                                                                     |
|------------------------------------------------|-----------------------------------------------------------------------------------------------|-----------------------------------------------------------------------------------------------------|
| SS44 (Noncarrier)                              | EF is 2 STD Dev from mean                                                                     |                                                                                                     |
| SS69 (Noncarrier)                              | EF = 38.3; LVIDd=5.5; IVSd=1.1;<br>LVPWd=1.1; LA Vol=59.2                                     | DSP, R1509K, PP2=0.956, GERP=5.74,<br>ExAC_SAS=0.001                                                |
| SS43 (Noncarrier)                              | EF=62.9; LVIDd=5.7; LVIDs=3.7; IVSd=0.58;<br>LA Vol=63.8                                      |                                                                                                     |
| SS65 ( <i>MYBPC3</i> <sup>Δ25bp</sup> )        | EF=78.8; age=75; 1 <sup>st</sup> degree AV block;<br>septal and inferior infarct; LA Vol=54.6 | SCN5A, C1004R, PP2=0.999, GERP=5.38,<br>ExAC_SAS=0.002                                              |
| SS26 ( <i>MYBPC3</i> <sup>Δ25bp</sup> )        | EF=74.8; Mitral E to A ratio = 2.4 (highest)                                                  | MYH7, D1798N, PP2=1, GERP=5.12, ExAC_SAS=0<br>GAA, G123E, PP2=0.998, GERP=4.85,<br>ExAC_SAS=0.0001; |
| SS28<br><i>MYBPC3</i> <sup>Δ25bp/D389V</sup> ) | EF=60.4; T wave abn, possible anterolateral<br>ischemia (ECG); LVIDd=5.3; LVIDs=3.6           | GAA, S448T, PP2=0.8, GERP=4.18, ExAC_SAS=0.008                                                      |
| SS37<br><i>MYBPC3</i> <sup>Δ25bp/D389V</sup> ) | EF=57.2; LVIDd=5.1; IVS/PW=0.53; LA<br>Vol=62.4                                               | DSP, FBN1, FBN2, FKTN (all rare, potentially deleterious)                                           |

Rationale for exclusion of subjects from analysis: determined to have presence of mutations in genes known to cause cardiomyopathy, determined to have abnormally deviated echocardiographic parameters, or determined to have known prior cardiovascular disease.
